# Supplementary material for: Digital Spatial Profiling identifies phospho-JNK as a biomarker for early risk stratification of aggressive prostate cancer
Source: bioRxiv or medRxiv preprint supplement (doi:10.1101/2024.12.20.24319439), 2024-12-22
Supplement: Supplementary file [file media-1.pdf]

**Supplementary Table 1**

| <b>Immune Cell Profiling</b> | <b>MAPK Signaling</b>                  | <b>Cell Death</b> | <b>PI3K/AKT signaling</b>              |
|------------------------------|----------------------------------------|-------------------|----------------------------------------|
| PD-1                         | BRAF                                   | BAD               | Phospho-AKT1 (S473)                    |
| Pan-cytokeratin              | EGFR                                   | BCL6              | Phospho-GSK3B (S9)                     |
| CD68                         | Phospho-JNK (T183/Y185)                | BCLXL             | Phospho-GSK3A (S21)/Phospho-GSK3B (S9) |
| HLA-DR                       | Phospho-MEK1 (S217/S221)               | CD95/Fas          | INPP4B                                 |
| SMA                          | Phospho-p38 MAPK (T180/Y182)           | GZMA              | PLCG1                                  |
| Ki-67                        | Phospho-p44/42 MAPK ERK1/2 (T202/Y204) | Cleaved Caspase 9 | Phospho-PRAS40 (T246)                  |
| Beta-2-microglobulin         | pan-RAS                                | p53               | Phospho-Tuberin (T1462)                |
| CD11c                        | Phospho-p44/42 MAPK ERK1/2 (T202/Y204) | PARP              | Pan-AKT                                |
| CD20                         | Phospho-p90 RSK (T359/S363)            | BIM               | MET                                    |
| CD3                          |                                        | Neurofibromin     |                                        |
| CD4                          |                                        |                   |                                        |
| CD45                         |                                        |                   |                                        |
| CD56                         |                                        |                   |                                        |
| CD8                          |                                        |                   |                                        |
| CTLA4                        |                                        |                   |                                        |
| GZMB                         |                                        |                   |                                        |
| PD-L1                        |                                        |                   |                                        |
| Fibronectin                  |                                        |                   |                                        |
| GAPDH                        |                                        |                   |                                        |
| Histon H3                    |                                        |                   |                                        |
| S6                           |                                        |                   |                                        |
| Rb IgG                       |                                        |                   |                                        |
| Ms IgG1                      |                                        |                   |                                        |
| Ms IgG2a                     |                                        |                   |                                        |
