# Supplementary material for: Digital Spatial Profiling identifies phospho-JNK as a biomarker for early risk stratification of aggressive prostate cancer
Source: bioRxiv or medRxiv preprint supplement (doi:10.1101/2024.12.20.24319439), 2024-12-22
Supplement: Supplementary file [file media-2.pdf]

**Supplementary Table S2**

| TMA | Patient_ID | Tumor_status | ROI | Gleason |
|-----|------------|--------------|-----|---------|
| 1   | P1         | Localized    | 1   | 3       |
|     |            |              | 2   | 4       |
|     |            |              | 3   | 3       |
|     |            |              | 4   | 4       |
|     | P2         | Localized    | 5   | 3       |
|     |            |              | 6   | 4       |
|     |            |              | 7   | 4       |
|     | P3         | Localized    | 8   | 3       |
|     |            |              | 9   | 4       |
|     |            |              | 10  | 4       |
|     | P4         | Localized    | 11  | 3       |
|     |            |              | 12  | 4       |
|     | P5         | Localized    | 13  | 3       |
|     |            |              | 14  | 4       |
|     |            |              | 15  | 4       |
|     | P6         | Advanced     | 16  | 3       |
|     |            |              | 17  | 4       |
|     |            |              | 18  | 3       |
|     | P7         | Localized    | 19  | 3       |
|     |            |              | 20  | 4       |
|     |            |              | 21  | 4       |
|     |            |              | 22  | 3       |
|     | P8         | Localized    | 23  | 4       |
| 2   | P9         | Advanced     | 24  | 3       |
|     |            |              | 25  | 4       |
|     |            |              | 26  | 4       |
|     |            |              | 27  | 5       |
|     | P10        | Localized    | 28  | 3       |
|     | P11        | Localized    | 29  | 3       |
|     |            |              | 30  | 4       |
|     | P12        | Localized    | 31  | 4       |
|     |            |              | 32  | 3       |
|     | P13        | Localized    | 33  | 4       |
|     |            |              | 34  | 3       |
|     |            |              | 35  | 4       |
|     | P14        | Localized    | 36  | 3       |
|     |            |              | 37  | 4       |
|     | P15        | Localized    | 38  | 4       |
| P16 | Advanced   | 39           | 3   |         |
|     |            | 40           | 4   |         |
| P17 | Localized  | 41           | 3   |         |
|     |            | 42           | 4   |         |
| P18 | Localized  | 43           | 3   |         |
|     |            | 44           | 4   |         |

|     |           |           |    |   |
|-----|-----------|-----------|----|---|
| 3   | P19       | Localized | 45 | 3 |
|     | P20       | Localized | 46 | 3 |
|     | P21       | Localized | 47 | 3 |
|     |           |           | 48 | 5 |
|     | P22       | Localized | 49 | 4 |
|     | P23       | Localized | 50 | 4 |
|     | P24       | Localized | 51 | 4 |
| 4   | P25       | Localized | 52 | 3 |
|     |           |           | 53 | 4 |
|     |           |           | 54 | 3 |
|     |           |           | 55 | 4 |
|     | P26       | Localized | 56 | 3 |
|     |           |           | 57 | 4 |
|     |           |           | 58 | 3 |
|     |           |           | 59 | 4 |
|     | P27       | Localized | 60 | 3 |
|     |           |           | 61 | 4 |
|     |           |           | 62 | 3 |
|     | P28       | Advanced  | 63 | 3 |
|     |           |           | 64 | 4 |
|     |           |           | 65 | 3 |
|     |           |           | 66 | 4 |
|     |           |           | 67 | 5 |
|     | P29       | Advanced  | 68 | 3 |
|     |           |           | 69 | 4 |
|     |           |           | 70 | 3 |
|     |           |           | 71 | 4 |
| P30 | Localized | 72        | 4  |   |
|     |           | 73        | 4  |   |
| P31 | Localized | 74        | 4  |   |
|     |           | 75        | 3  |   |
|     |           | 76        | 4  |   |
| P32 | Localized | 77        | 5  |   |
|     |           | 78        | 3  |   |
|     |           | 79        | 4  |   |
|     |           | 80        | 5  |   |
| P33 | Localized | 81        | 4  |   |
|     |           | 82        | 4  |   |
| P34 | Localized | 83        | 3  |   |
|     |           | 84        | 4  |   |
| P35 | Advanced  | 85        | 3  |   |
|     |           | 86        | 5  |   |
|     |           | 87        | 3  |   |
| P36 | Advanced  | 88        | 4  |   |
|     |           | 89        | 5  |   |
|     |           | 90        | 3  |   |

|  |     |           |    |   |
|--|-----|-----------|----|---|
|  | P37 | Advanced  | 91 | 3 |
|  |     |           | 92 | 4 |
|  |     |           | 93 | 3 |
|  | P38 | Localized | 94 | 4 |
